# Supplementary material for: Design Quality in the Context of Healthcare Environments: A Scoping Review
Source: PubMed Central journal article supplement — HERD. 2016 Dec 18;10(4):136–50. doi: 10.1177/1937586716679404 (PMC5484461; doi:10.1177/1937586716679404), 2016-12-18
Supplement: Design_Quality_in_the_Context_of_Healthcare_Environments.pdf [file Design_Quality_in_the_Context_of_Healthcare_Environments.pdf]

**Design Quality in the Context of Healthcare Environments: a Scoping Review**

**Authors:** Anna Anåker, Ann Heylighen, Susanna Nordin and Marie Elf

**Course ID #** HERD56

| Full Name | AIA # / EDAC # | Email | Phone # |
|-----------|----------------|-------|---------|
|           |                |       |         |

**Learning Objective 1:** Understand and demonstrate the value, principles and the different concepts related to a scoping review.

**Learning Objective 2:** Identify the strengths, limitations and pitfalls of a scoping review.

**Learning Objectives 3:** Describe central parts of the concept design quality in the context of healthcare environments.

**Learning Objective 4:** Understand the concept of design quality and its relation to an evidence based design.

**Question 1:** In a scoping review, it is not common to evaluate the quality of the publications included in the review. Discuss why, and if you think it is necessary for the methodology and results.

---



---



---



---

**Question 2:** According to the article, design quality of physical healthcare environments involves three different themes. Describe the themes and reflect upon the content of those three themes.

---



---



---



---

**Question 3:** Discuss why collaboration between representatives from healthcare organizations, planners, architects and researchers is required when building a deeper understanding of design quality and problematize design quality and its relation to an evidence-based design.

---



---



---



---

To earn AIA continuing education units please complete form, and email Catherine Ancheta at [cancheta@healthdesign.org](mailto:cancheta@healthdesign.org) and your credits will be uploaded to your AIA account. To earn EDAC continuing education units please complete the form, retain the form for your records and self-submit the credits at the time of your EDAC renewal. The form is your “proof of attendance.”
